# Supplementary material for: Heat Flux Intensified Coastal Thermal Fronts in the East China Shelf Seas
Source: Research Square preprint supplement (doi:10.21203/rs.3.rs-8798245/v1), 2026-02-10
Supplement: Supplementary file 1 [file b413b91596ebe325735df350.docx]

Supporting Information for

**Heat Flux Intensified Coastal Thermal Fronts in the East China Shelf Seas**

Xueyang Chen1, Lei Lin2, Yiyang Ji1, Qi Quan1*, Dongyan Liu1, 3*

Corresponding authors. Email: [qquan@sklec.ecnu.edu.cn](mailto:qq@sklec.ecnu.edu.cn); [dyliu@sklec.ecnu.edu.cn](mailto:dyliu@sklec.ecnu.edu.cn)

**Contents of this file**

Supplementary Figs. 1 to 3

**Introduction**

We include three figures as supporting information to complement the main text. Supplementary Fig. 1 compares the MURSST and OFES2 fields, confirming their consistency in capturing sea surface temperature (SST) and gradient magnitude (GM) structures. As referenced in discussion, Fig. 2 presents the spatial ratios of wintertime heat-flux components to Qnet and their interannual variability in the Bohai–Yellow Seas and the East China Sea, respectively, providing additional physical context for the thermodynamic interpretation. Fig. 3 shows the seasonal climatology of GM derived from MUR SST (2003–2024), illustrating the persistence and seasonal evolution of the ten quasi-stationary fronts across the East China Shelf Seas and offering background context for the wintertime analyses. Fig. 3c displays the spatial trend of MUR SST anomalies, demonstrating how air-sea heat flux (Qnet) and oceanic advection (Qv) jointly influence SST changes across frontal zones and supporting the relative contribution framework of Equation (4).

***
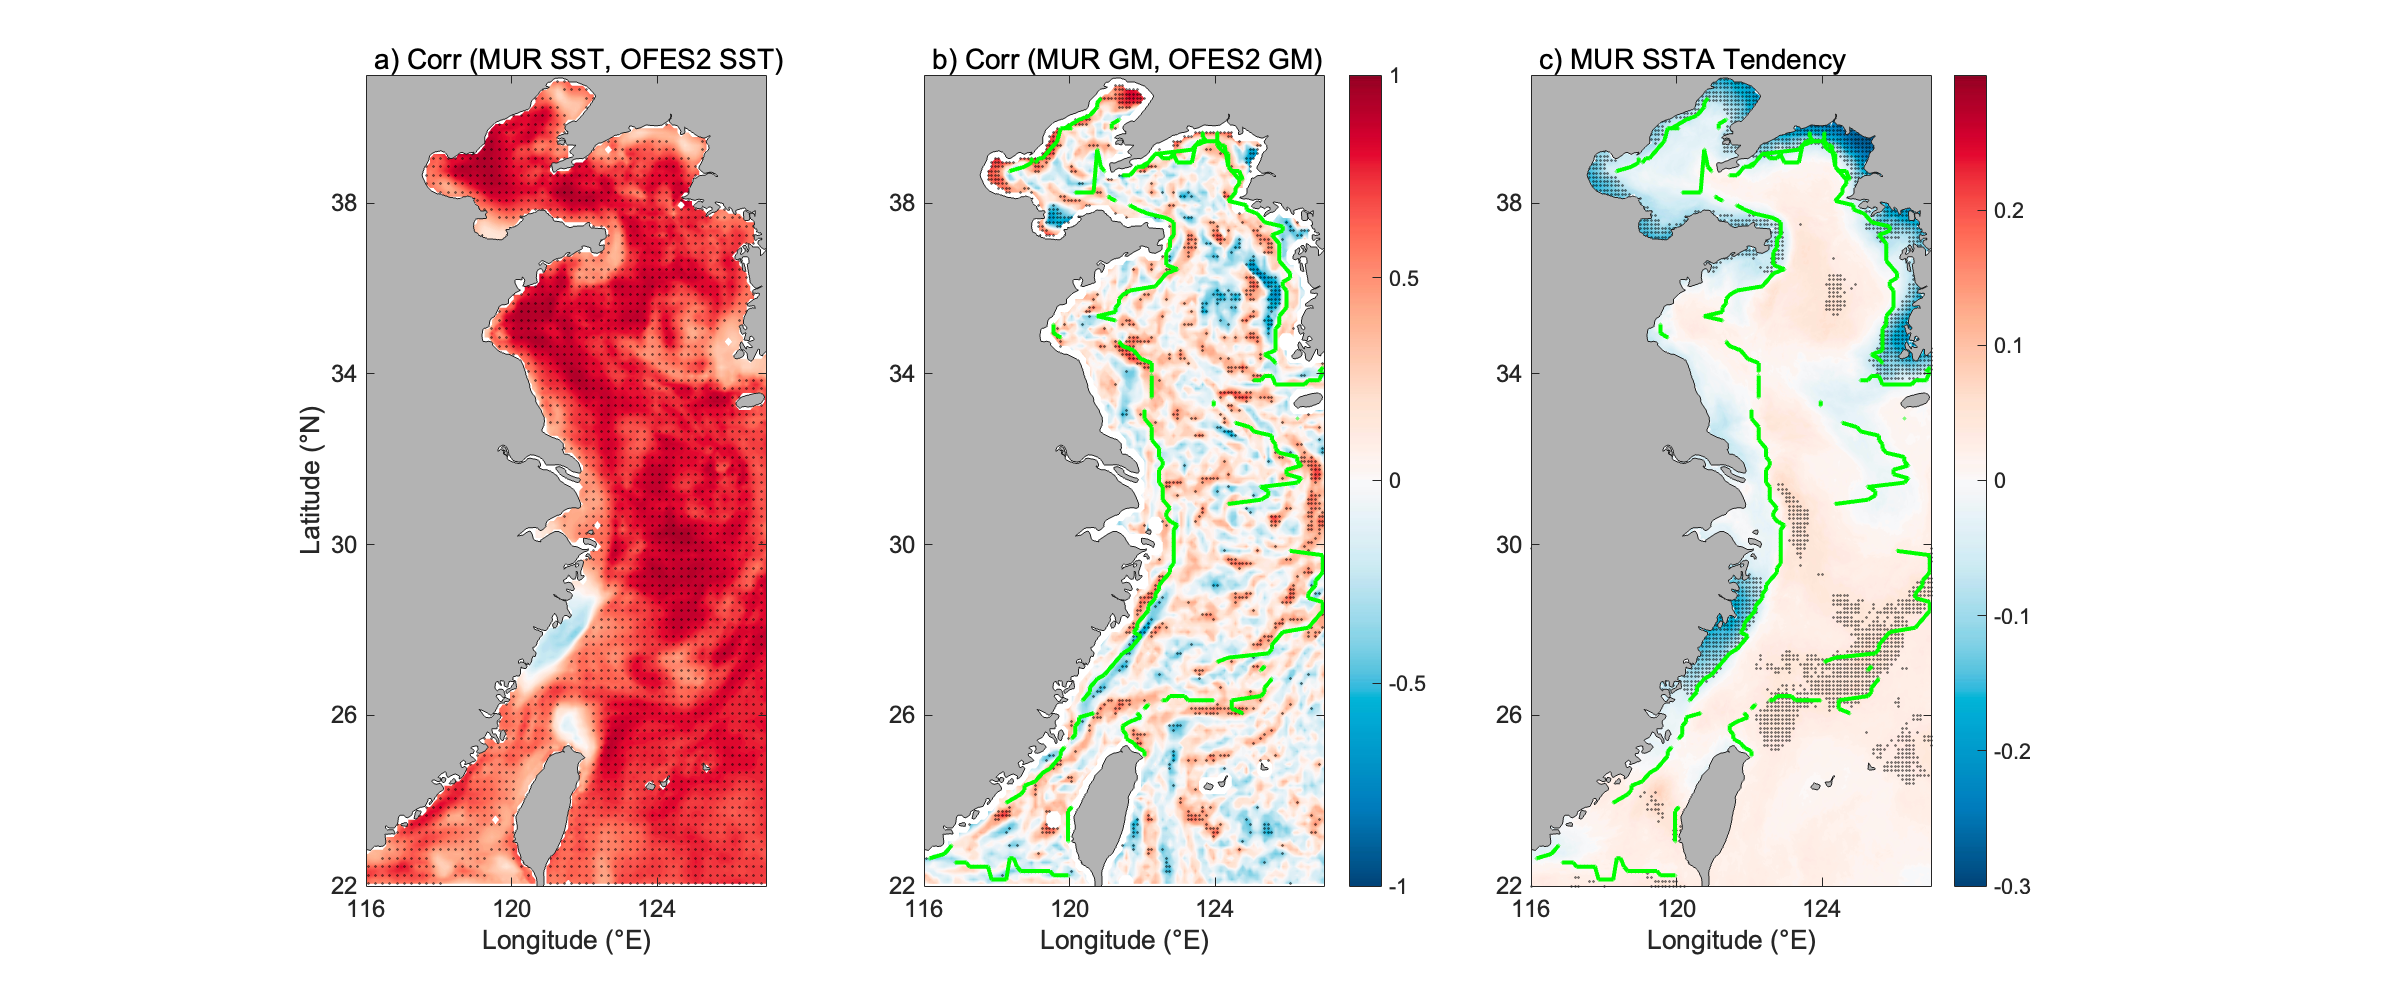
***

**Fig. 1** | Spatial distribution of Pearson correlation coefficients for (a) SST and (b) GM fields between the MURSST and OFES2 datasets, and (c) the MUR SSTA tendency (units: °C yr-1). Green lines indicate the frontal positions. Dotted areas pass the t-test at the 95% significance level.


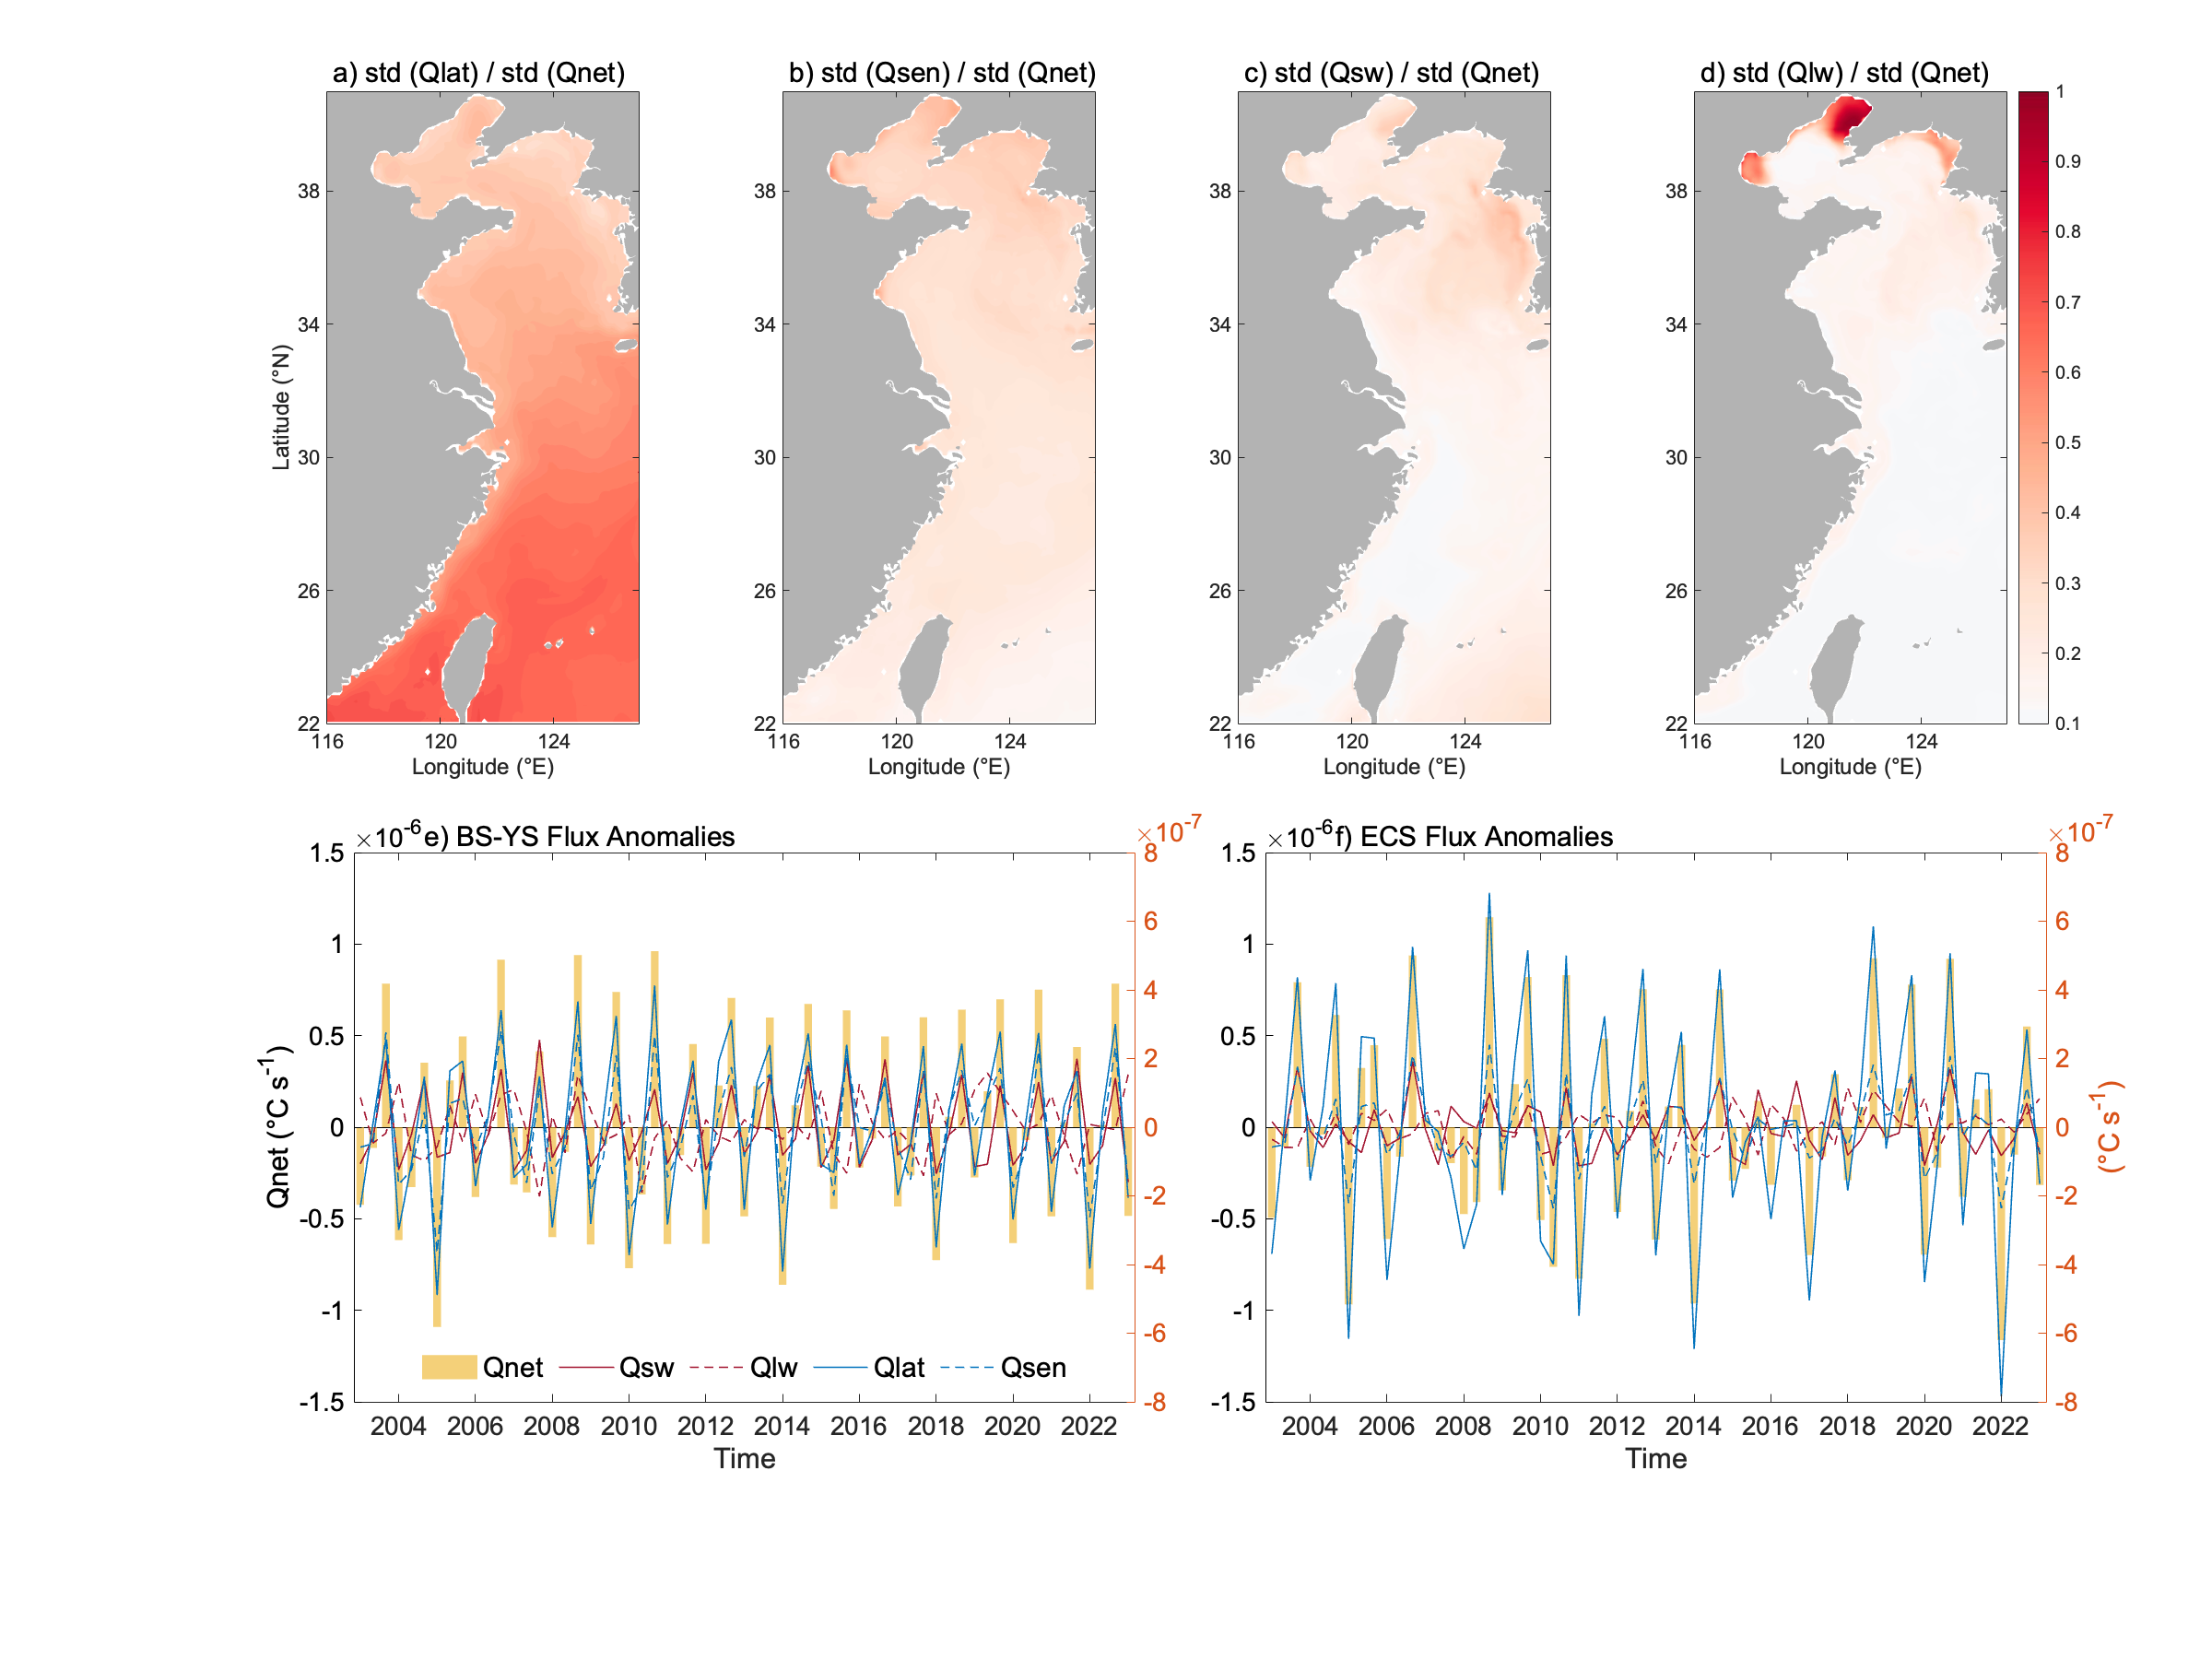


**Fig. 2 |** (a-d) Spatial distributions of the ratios of surface heat flux components to Qnet during winter for 2003-2023. Qlat, Qsen**,** Qsw, Qlw represent the latent and sensible heat flux**,** net downward shortwaveand longwaveheat flux, respectively, calculated used the same processing method as Qnet. And the time series of zonal anomalous heat flux variables for (e) the BS-YS and (f) the ECS. Yellow bars represent Qnet, while solid and dashed lines indicate the components of Qnet.

**
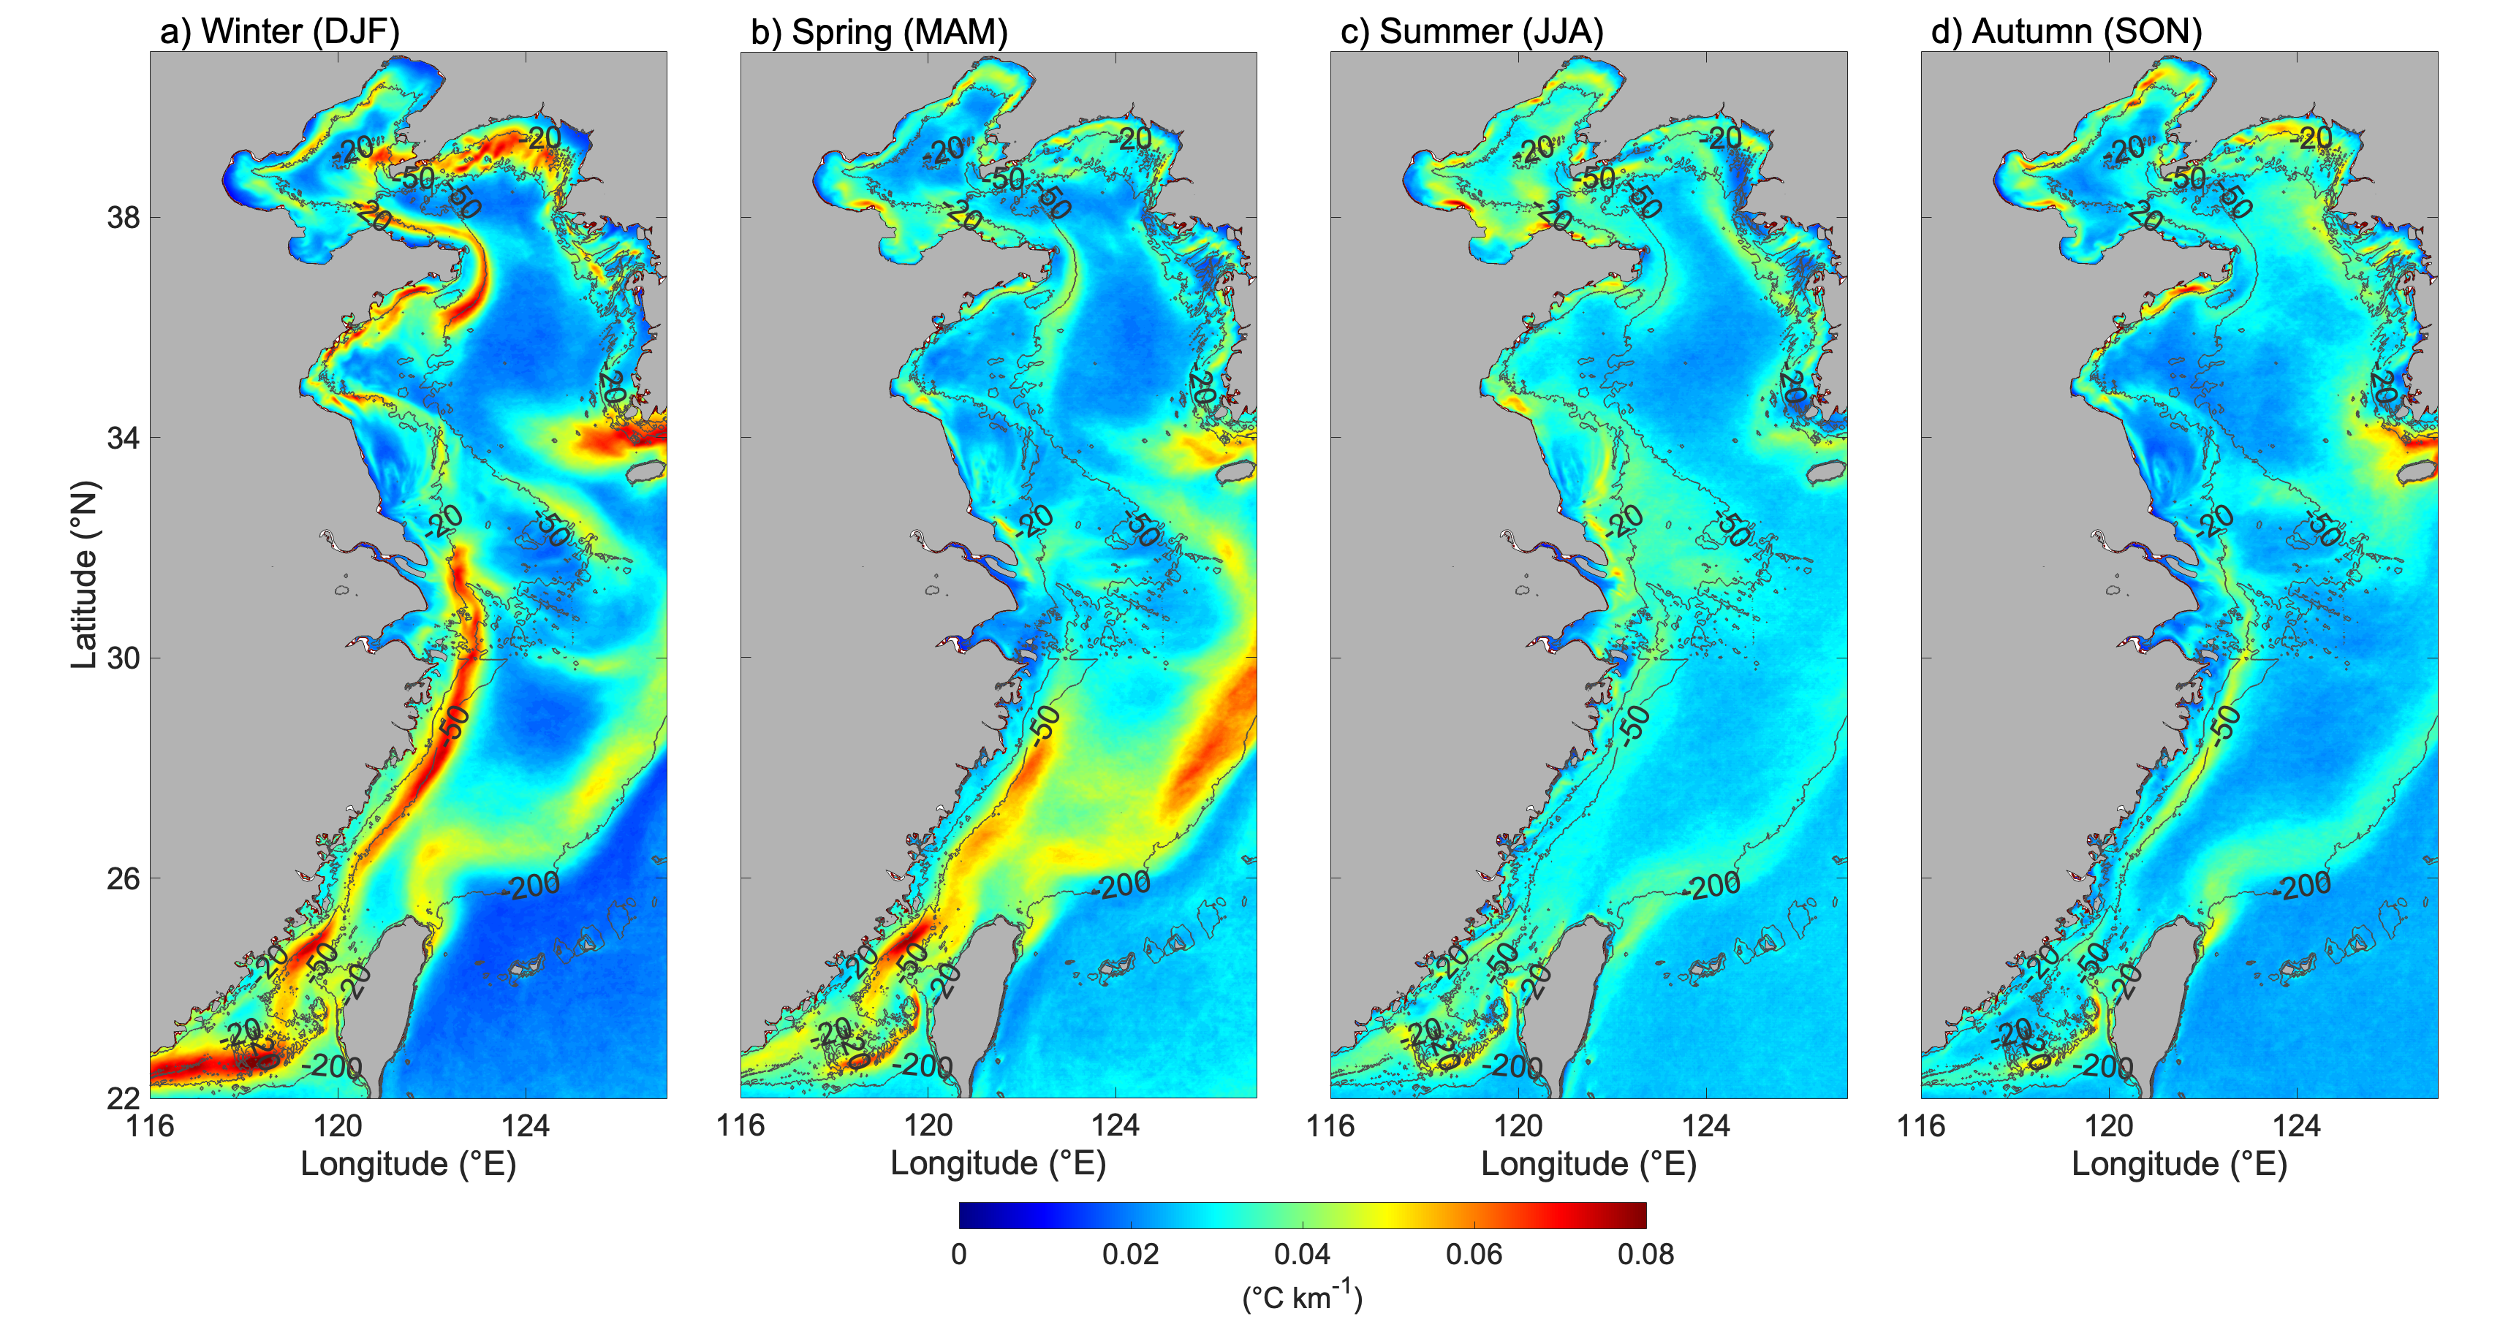
Fig. 3** | Seasonal mean GM climatology (units: °C km⁻¹) derived from MUR SST (2003–2024). (a) Winter (Dec–Feb); (b) Spring (Mar–May); (c) Summer (Jun–Aug); (d) Autumn (Sep–Nov). Gray contours indicate bathymetry (units: m).
